# Supplementary material for: Effect of wheat bread with elevated amylose on postprandial glycaemic response: a randomised crossover trial delivered remotely using continuous glucose monitoring
Source: Royal Society of Chemistry journal article supplement (doi:10.1039/d5fo03147h), 2025-01-01
Supplement: d5fo03147h1.pdf [file d5fo03147h1.pdf]

## Supplementary Information

### Effect of wheat bread with elevated amylose on postprandial glycaemic response: a randomised crossover trial delivered remotely using continuous glucose monitoring

**Supplementary Table 1.** Certificate of microbiology analysis by ALS Laboratories (UK) Limited – Sands Mill, Huddersfield Road, Mirfield, West Yorkshire, WF14 9DQ

| Sample         | Method    | Test                                                | Result       | Unit    |
|----------------|-----------|-----------------------------------------------------|--------------|---------|
| sbell<br>bread | ESGM-M300 | Total Viable Count, 2 days                          | <10          | cfu / g |
|                | ESGM-M303 | Enterobacteriaceae (presumptive)                    | <10          | cfu / g |
|                | ESGM-M304 | Escherichia coli ( $\beta$ -Glucuronidase positive) | <10          | cfu / g |
|                | ESGMM307  | Coagulase positive Staphylococci (presumptive)      | <20          | cfu / g |
|                | ESGM-M319 | Bacillus cereus (presumptive)                       | <20          | cfu / g |
|                | ESGM-M310 | Clostridium perfringens (presumptive)               | <10          | cfu / g |
|                | ESGM-M308 | Yeasts                                              | <20          | cfu / g |
|                | ESGM-M308 | Moulds                                              | <20          | cfu / g |
|                | ESGM-M515 | Salmonella sp. (ELISA)                              | Not detected | /25 g   |
| WT<br>bread    | ESGM-M300 | Total Viable Count, 2 days                          | <10          | cfu / g |
|                | ESGM-M303 | Enterobacteriaceae (presumptive)                    | <10          | cfu / g |
|                | ESGM-M304 | Escherichia coli ( $\beta$ -Glucuronidase positive) | <10          | cfu / g |
|                | ESGMM307  | Coagulase positive Staphylococci (presumptive)      | <20          | cfu / g |
|                | ESGM-M319 | Bacillus cereus (presumptive)                       | <20          | cfu / g |
|                | ESGM-M310 | Clostridium perfringens (presumptive)               | <10          | cfu / g |
|                | ESGM-M308 | Yeasts                                              | <20          | cfu / g |
|                | ESGM-M308 | Moulds                                              | <20          | cfu / g |
|                | ESGM-M515 | Salmonella sp. (ELISA)                              | Not detected | /25 g   |

**Supplementary Table 2.** Proximate analysis of flour by ALS Laboratories (UK) Limited – Sands Mill, Huddersfield Road, Mirfield, West Yorkshire, WF14 9DQ

| Parameter                                                   | Method    | WT control | sbell |
|-------------------------------------------------------------|-----------|------------|-------|
| Moisture (Loss on Drying) g / 100g                          | AM/C/801  | 14.5       | 13.7  |
| Protein (Nx6.25) g / 100g                                   | AM/C/224  | 14.9       | 17.1  |
| Total Fat (NMR) g / 100g                                    | AM/C/1015 | 0.9        | 0.6   |
| Ash g / 100g                                                | AM/C/803  | 0.5        | 0.7   |
| Total Carbohydrate (by difference) g / 100g                 | AM/C/901  | 69.2       | 67.9  |
| Total Dietary Fibre (based on AOAC method 2017.16) g / 100g | AM/C/309  | 4.1        | 5.8   |
| Available Carbohydrate (by difference) g / 100g             | AM/C/901  | 65.1       | 62.1  |
| Energy kcal / 100g                                          | AM/C/901  | 336        | 334   |
| Energy kJ / 100g                                            | AM/C/901  | 1426       | 1415  |
| Total Sugar g / 100g                                        | AM/C/1014 | 0.7        | 1.2   |
| Starch (by difference) g / 100g                             | AM/C/901  | 64.4       | 60.8  |
| Sodium (ICP-OES) mg / 100g                                  | AM/C/1002 | <3         | <3    |
| Sodium Expressed as Salt g / 100g                           | AM/C/1002 | <0.01      | <0.01 |
| Saturated Fatty Acids g / 100g                              | AM/C/107  | 0.19       | 0.12  |
| Monounsaturated Fatty Acids g / 100g                        | AM/C/107  | 0.11       | 0.08  |
| Polyunsaturated Fatty Acids g / 100g                        | AM/C/107  | 0.56       | 0.37  |

**Supplementary Table 3.** Nutritional composition and ingredients of Flora Dairy Free Spread (obtained using Nutritics database).

|               | Per 100g |      | Per 10 g Serving |      |
|---------------|----------|------|------------------|------|
| Energy(kcal)  | 634      | kcal | 63.4             | kcal |
| Energy(Kj)    | 2607     | kJ   | 260.7            | kJ   |
| Carbohydrate  | 0.5      | g    | 0.05             | g    |
| Protein       | 0.5      | g    | 0.05             | g    |
| Fat           | 70       | g    | 7                | g    |
| Water         | 28       | g    | 2.8              | g    |
| Sugars        | 0.5      | g    | 0.05             | g    |
| Saturated Fat | 17       | g    | 1.7              | g    |
| Omega3(n-3)   | 3.9      | g    | 0.39             | g    |
| Sodium        | 360      | mg   | 36               | mg   |
| Chloride      | 545      | mg   | 54.5             | mg   |
| Vitamin A     | 120      | ug   | 12               | ug   |

**Ingredients:** Plant Oils (Sunflower, Rapeseed, Palm\*), Water, Salt, Plant Based Emulsifier (Sunflower Lecithin), Vinegar, Natural Flavouring, Vitamin A, \*Flora contributes to the production of sustainable palm oil

**Supplementary Table 4.** Questions used for satiety and palatability assessment.

1. Which study food will you be testing?
2. Are you feeling well today?
3. When was the last time you had something to eat or drink (other than water)?
4. What did you last have to eat and drink?
5. How much could you eat?
6. How strong is your urge to eat?
7. How strong is your thought of food?
8. How would you describe the test meal?
9. Did you finish the entire test meal?
10. If not, approximately how much did you have (eat/drink)?
11. Where there any specific parts of the meal that you left behind?
12. Overall liking:
  - a. Aroma (smell)
  - b. Flavour (taste)
  - c. Sweetness
  - d. Bitterness
13. How often would you like to eat this test meal?
14. How was the portion size of the test meal?
15. Do you have any other comments about the test meal?
16. How much could you eat?
17. How strong is your urge to eat?
18. How strong is your thought of food?

**Supplementary Table 5.** Variance components from the random slope models

| Measure    | Random intercept standard deviation | Random slope standard deviation | Residual standard deviation |
|------------|-------------------------------------|---------------------------------|-----------------------------|
| iMax120    | 0.634                               | 0.040                           | 0.616                       |
| iMax240240 | 0.628                               | 0.060                           | 0.614                       |
| iAUC120    | 39.479                              | 27.198                          | 36.676                      |
| iAUC240    | 53.638                              | 41.207                          | 59.120                      |

**Supplementary Figure 1.** Glucose concentration traces during the pre-prandial and postprandial periods for each participant. The x-axis represents time (minutes) relative to self-reported meal start (black line), and the y-axis shows glucose concentration (mmol/L).

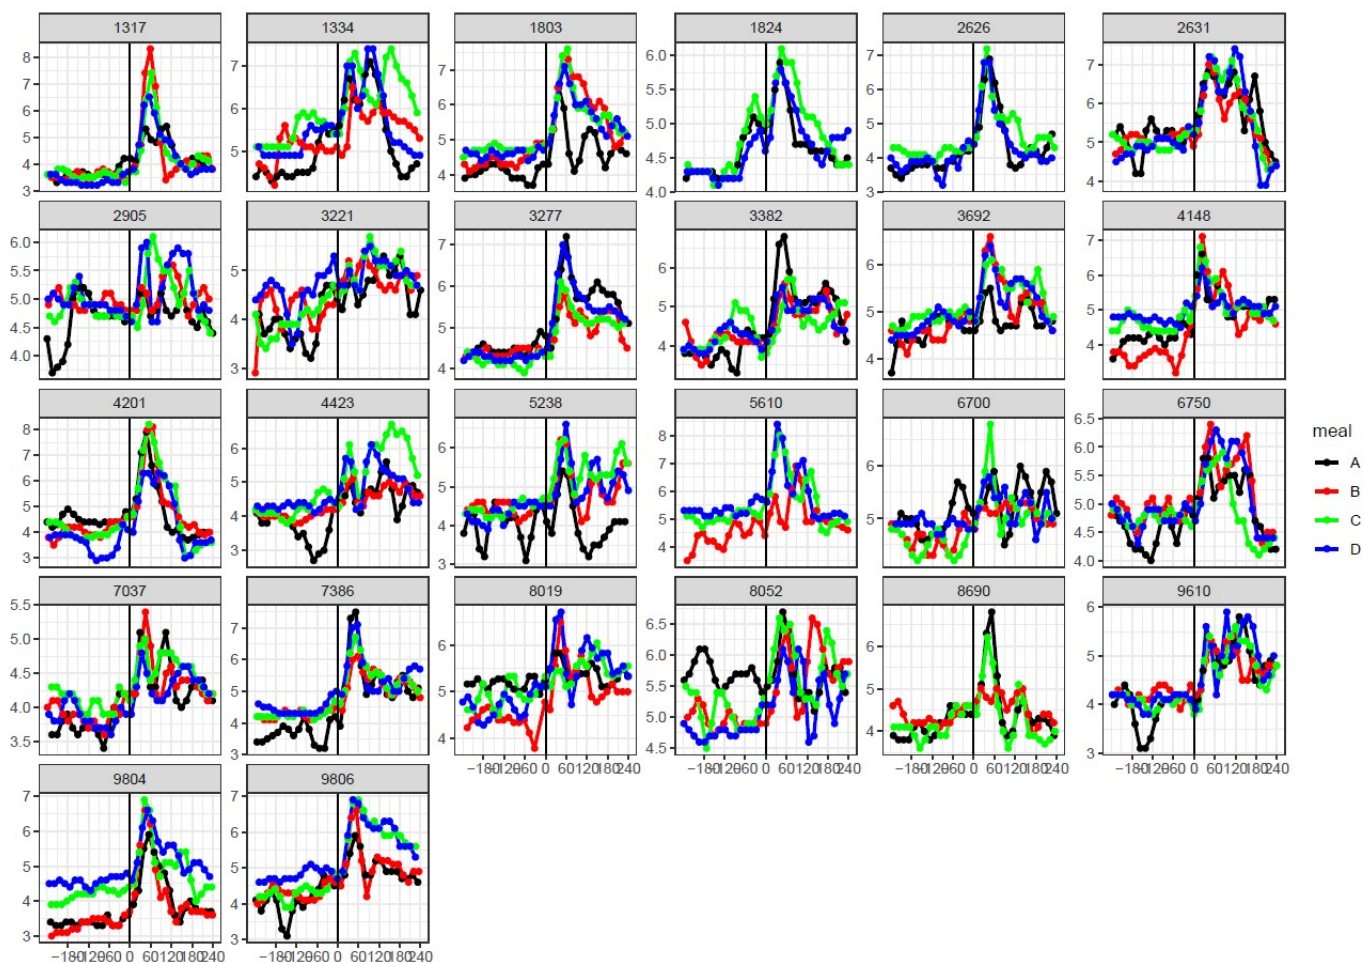

Supplementary Figure 2. *D*  
often would you eat this bread

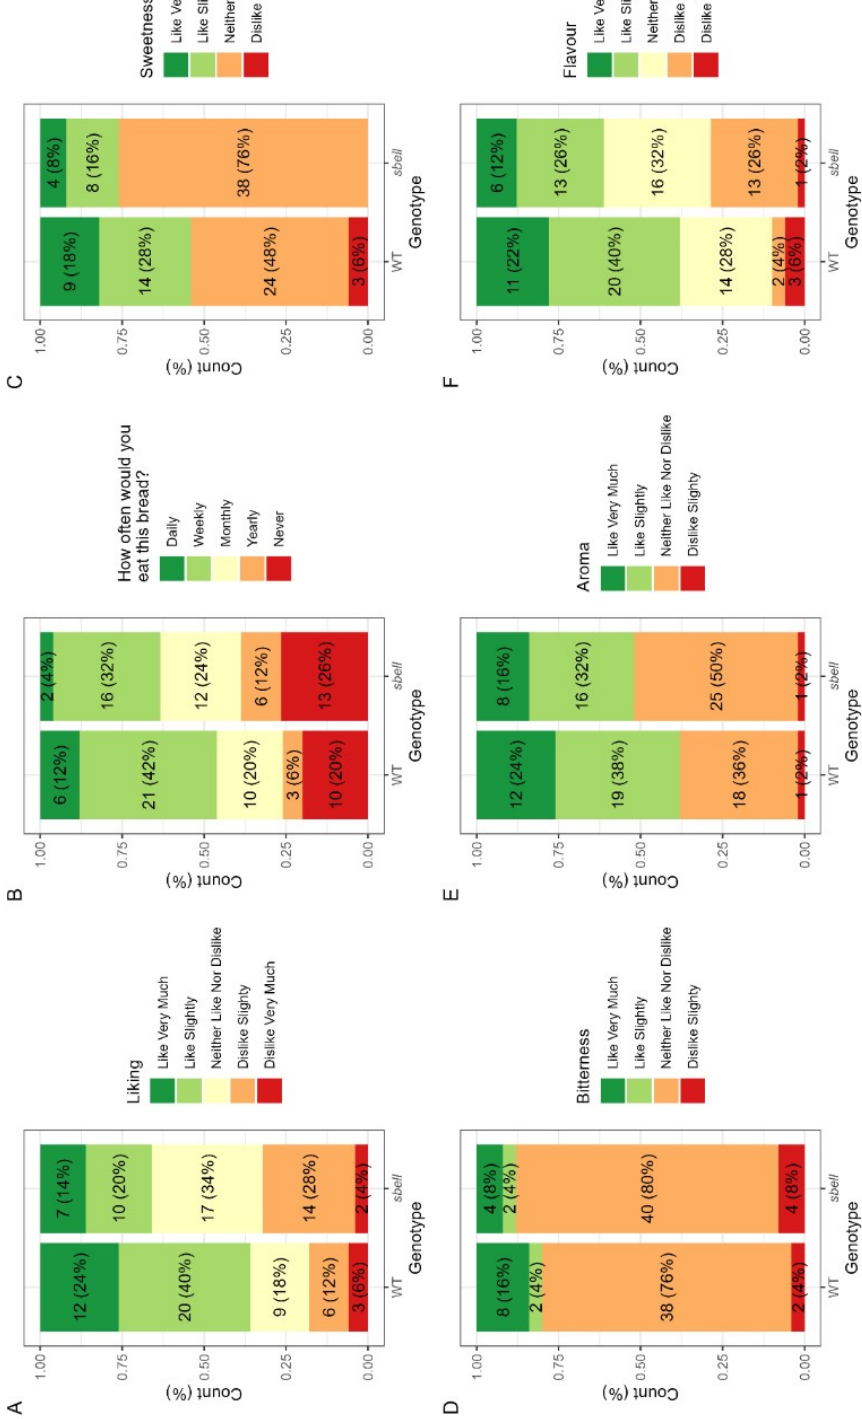

ing. *B.* 'How
